# Supplementary material
Source: PubMed Central journal article supplement (PMC5528266)
Supplement: MOL2-5-093-s004.pdf [file MOL2-5-093-s004.pdf]

Supplementary Table. Overall results from isobologram (synergy) analyses of imatinib/ABT-737 combinations in GIST-T1, GIST882, and GIST48IM cells, performed for growth inhibition and apoptosis.

| COMBINATIONS           |                       | GROWTH INHIBITION |         |            |         |            |          |            |   | APOPTOSIS |     |         |     |
|------------------------|-----------------------|-------------------|---------|------------|---------|------------|----------|------------|---|-----------|-----|---------|-----|
| Imatinib<br>( $\mu$ M) | ABT-737<br>( $\mu$ M) | #                 | GIST-T1 |            | GIST882 |            | GIST48IM |            | # | GIST-T1   |     | GIST882 |     |
|                        |                       |                   | Fa      | CI         | Fa      | CI         | Fa       | CI         |   | Fa        | CI  | Fa      | CI  |
| 0.1                    | 0.1                   | 1                 | 0.82    | 0.0        | 0.57    | 0.1        | 0.41     | 0.6        | 1 | 0.15      | 0.1 | 0.02    | 0.1 |
| 0.1                    | 1                     | 2                 | 0.82    | 0.1        | 0.63    | 0.3        | 0.64     | 0.9        | 2 | 0.26      | 0.1 | 0.08    | 0.2 |
| 0.1                    | 10                    | 3                 | 0.88    | 0.4        | 0.83    | <u>1.2</u> | 0.80     | <u>1.9</u> | 3 | 0.55      | 0.0 | 0.15    | 0.8 |
| 0.1                    | 20                    | 4                 | 0.98    | 0.2        | 0.98    | 0.2        | 0.91     | 0.6        |   |           |     |         |     |
| 1                      | 0.1                   | 5                 | 0.83    | 0.2        | 0.59    | 0.1        | 0.47     | 0.4        | 4 | 0.22      | 0.3 | 0.02    | 0.1 |
| 1                      | 1                     | 6                 | 0.83    | 0.3        | 0.67    | 0.3        | 0.66     | 0.8        | 5 | 0.31      | 0.1 | 0.08    | 0.2 |
| 1                      | 10                    | 7                 | 0.89    | 0.4        | 0.86    | 1.0        | 0.80     | <u>1.8</u> | 6 | 0.69      | 0.0 | 0.22    | 0.5 |
| 1                      | 20                    | 8                 | 0.97    | 0.2        | 0.98    | 0.3        | 0.91     | 0.6        |   |           |     |         |     |
| 10                     | 0.1                   | 9                 | 0.81    | <u>4.7</u> | 0.70    | 0.1        | 0.58     | 0.4        |   |           |     |         |     |
| 10                     | 1                     | 10                | 0.85    | 0.6        | 0.82    | 0.1        | 0.75     | 0.4        |   |           |     |         |     |
| 10                     | 10                    | 11                | 0.96    | 0.2        | 0.95    | 0.3        | 0.80     | <u>1.8</u> |   |           |     |         |     |
| 10                     | 20                    | 12                | 0.97    | 0.3        | 0.98    | 0.3        | 0.91     | 0.5        |   |           |     |         |     |
